# Supplementary material for: Exacerbation of Neonatal Hemolysis and Impaired Renal Iron Handling in Heme Oxygenase 1-Deficient Mice
Source: PubMed Central journal article supplement (PMC7589678; doi:10.3390/ijms21207754), 2020-10-20
Supplement: ijms-21-07754-s001.pdf [file ijms-21-07754-s001.pdf]

Supplementary Materials

Table S1 - *Antibodies Used in Immunoblotting*

| Target protein                 | Primary Ab                                                               | Primary Ab dilution | Secondary Ab                                                     | Secondary Ab dilution |
|--------------------------------|--------------------------------------------------------------------------|---------------------|------------------------------------------------------------------|-----------------------|
| Hemopexin                      | Mouse polyclonal, kind gift from E. Tolosano, University of Turin, Italy | 1:2000              | Goat anti-mouse polyclonal, #A5278 (Sigma-Aldrich)               | 1:20 000              |
| Lactate dehydrogenase 2 (LDH2) | Rabbit polyclonal, Proteintech, #14824-1-AP                              | 1:1000              | Goat anti-rabbit polyclonal, #A6154 (Sigma-Aldrich)              | 1:20 000              |
| Albumin                        | Rabbit polyclonal, Santa Cruz Biotechnology, #SC-50536                   | 1:1000              | Goat anti-rabbit polyclonal, #A6154 (Sigma)                      | 1:20 000              |
| Slc48a1 (HRG1)                 | Rabbit polyclonal, Novus, #QC13349                                       | 1:500               | Goat anti-rabbit polyclonal, #A6154 (Sigma-Aldrich)              | 1:20 000              |
| Ferroportin (Fpn)              | Rabbit polyclonal, Alpha Diagnostic International, #MTP11-A              | 1:1000              | Goat anti-rabbit polyclonal, #A6154 (Sigma-Aldrich)              | 1:20 000              |
| Actin                          | Goat polyclonal, Santa Cruz Biotechnology, #SC-1615                      | 1:2000              | Donkey anti-goat polyclonal, #SC-2020 (Santa Cruz Biotechnology) | 1:20 000              |

Table S2 - *Antibodies Used in Immunofluorescence Analysis*

| Target protein | Primary Ab                                                                    | Primary Ab dilution | Secondary Ab/Fluorochrome                                                                     | Secondary Ab dilution |
|----------------|-------------------------------------------------------------------------------|---------------------|-----------------------------------------------------------------------------------------------|-----------------------|
| HO1            | Rabbit polyclonal, Enzo Life Sciences, #ADI-OSA-150-F                         | 1:250               | Goat anti-rabbit conjugated with Cy3 <sup>®</sup> fluorochrome (Jackson ImmunoResearch)       | 1:500                 |
| HO2            | Rabbit polyclonal, Enzo Life Sciences, #ADI-OSA-200                           | 1:200               | Goat anti-rabbit conjugated with Cy3 <sup>®</sup> fluorochrome (Jackson ImmunoResearch)       | 1:500                 |
| Fpn            | Rabbit polyclonal, Alpha Diagnostic, #MTP11-A                                 | 1:250               | Goat anti-rabbit conjugated with Cy3 <sup>®</sup> fluorochrome (Jackson ImmunoResearch)       | 1:500                 |
| Slc48a1 (HRG1) | Rabbit polyclonal, kind gift from Prof. I. Hamza, University of Maryland, USA | 1:100               | Goat anti-rabbit conjugated with Cy3 <sup>®</sup> fluorochrome (Jackson ImmunoResearch)       | 1:500                 |
| Megalyn        | Rabbit polyclonal Abcam #ab76969                                              | 1 : 250             | Goat anti-rabbit conjugated with Cy3 <sup>®</sup> fluorochrome (Jackson ImmunoResearch)       | 1:500                 |
| Cubilin        | Sheep polyclonal Novus #AF3700                                                | 1 : 100             | Donkey anti-sheep conjugated with Alexa488 <sup>®</sup> fluorochrome (Jackson ImmunoResearch) | 1:500                 |

**Table S3 - Primers Used in Real Time PCR Analysis**

| <b>Target gene</b> | <b>Forward primer (5'→3')</b> | <b>Reverse primer (5'→3')</b> |
|--------------------|-------------------------------|-------------------------------|
| <i>Actb</i>        | GGCCAACCGTGAAAAGATGACCCA      | TACGACCAGAGGCATACAGGGACAG     |
| <i>Hmox2</i>       | AACAGGTCACTTGGGGTAGG          | TGCTCAGCCAGACAAAGGTA          |
| <i>HFt</i>         | GCTGAATGCAATGGAGTGTG          | CAGGGTGTGCTTGTCAAAGA          |
| <i>Hrg1</i>        | GACTCTGATGCTGGGTGATGG         | CTTCGTGGGTGCTCTCTTCTC         |
| <i>Hamp</i>        | TGCTCCTGCTTCTCCCT             | CTCTGTAGTCTGTCTCATCTGTG       |
